# Supplementary material
Source: publisher figshare collection journal article supplement (https://acs.figshare.com/ndownloader/files/3615582)
Supplement: Supplementary file 1 [file 3615582]

data_publication_text
_publ_contact_author_name        'Andrei Kutateladze'
_publ_contact_author_address     
;Department of Chemistry and Biochemistry
University of Denver
FW Olin Hall, 202
2190 E. Iliff Ave
Denver, CO 80208
;
_publ_contact_author_email       akutatel.edu
_publ_contact_author_phone       303-871-2995
_publ_contact_author_fax         303-871-2254
loop_
_publ_author_name
_publ_author_address
'Kutateladze, A.G.'
;Department of Chemistry and Biochemistry
University of Denver
FW Olin Hall, 202
2190 E. Iliff Ave
Denver, CO 80208
;
_publ_requested_journal          'Private Communication'
 
data_compound_32_oam40451_m 
 
_audit_creation_method            SHELXL-97 
_chemical_name_systematic
;
systematicname
;
_chemical_name_common             commonname                                    
_chemical_absolute_configuration  .                                             
_chemical_melting_point           .                                             
_chemical_formula_moiety           'C20 H18 N2 O4'                              
_chemical_formula_sum 
 'C20 H18 N2 O4' 
_chemical_formula_weight          350.36 
 
loop_ 
 _atom_type_symbol 
 _atom_type_description 
 _atom_type_scat_dispersion_real 
 _atom_type_scat_dispersion_imag 
 _atom_type_scat_source 
 'C'  'C'   0.0033   0.0016 
 'International Tables Vol C Tables 4.2.6.8 and 6.1.1.4' 
 'H'  'H'   0.0000   0.0000 
 'International Tables Vol C Tables 4.2.6.8 and 6.1.1.4' 
 'N'  'N'   0.0061   0.0033 
 'International Tables Vol C Tables 4.2.6.8 and 6.1.1.4' 
 'O'  'O'   0.0106   0.0060 
 'International Tables Vol C Tables 4.2.6.8 and 6.1.1.4' 
 
_symmetry_cell_setting            'Monoclinic'                                  
_symmetry_space_group_name_H-M    'P2(1)/c  '                                   
 
loop_ 
 _symmetry_equiv_pos_as_xyz 
 'x, y, z' 
 '-x, y+1/2, -z+1/2' 
 '-x, -y, -z' 
 'x, -y-1/2, z-1/2' 
 
_cell_length_a                    13.7987(16) 
_cell_length_b                    11.0811(13) 
_cell_length_c                    10.9368(12) 
_cell_angle_alpha                 90.00 
_cell_angle_beta                  98.595(5) 
_cell_angle_gamma                 90.00 
_cell_volume                      1653.5(3) 
_cell_formula_units_Z             4 
_cell_measurement_temperature     296(2) 
_cell_measurement_reflns_used     9050                                          
_cell_measurement_theta_min       2.37                                          
_cell_measurement_theta_max       27.33                                         
 
_exptl_crystal_description        'rectangular'                                 
_exptl_crystal_colour             'colourless'                                  
_exptl_crystal_size_max           0.50 
_exptl_crystal_size_mid           0.08 
_exptl_crystal_size_min           0.08 
_exptl_crystal_density_meas       .                                             
_exptl_crystal_density_diffrn     1.407 
_exptl_crystal_density_method     'not measured' 
_exptl_crystal_F_000              736 
_exptl_absorpt_coefficient_mu     0.099 
_exptl_absorpt_correction_type    multi-scan                                    
_exptl_absorpt_correction_T_min   0.9520 
_exptl_absorpt_correction_T_max   0.9921 
_exptl_absorpt_process_details    ? 
 
_exptl_special_details 
; 
 ? 
; 
 
_diffrn_ambient_temperature       296(2) 
_diffrn_radiation_wavelength      0.71073 
_diffrn_radiation_type            MoK\a 
_diffrn_radiation_source          'fine-focus sealed tube' 
_diffrn_radiation_monochromator   graphite 
_diffrn_measurement_device_type   'Bruker D8 APEX II Diffractometer'            
_diffrn_measurement_method        '\f and \w scans'                             
_diffrn_detector_area_resol_mean  8.33                                          
_diffrn_reflns_number             99362 
_diffrn_reflns_av_R_equivalents   0.0221 
_diffrn_reflns_av_sigmaI/netI     0.0056 
_diffrn_reflns_limit_h_min        -17 
_diffrn_reflns_limit_h_max        17 
_diffrn_reflns_limit_k_min        -13 
_diffrn_reflns_limit_k_max        13 
_diffrn_reflns_limit_l_min        -13 
_diffrn_reflns_limit_l_max        13 
_diffrn_reflns_theta_min          1.49 
_diffrn_reflns_theta_max          26.38 
_reflns_number_total              3384 
_reflns_number_gt                 3104 
_reflns_threshold_expression      >2sigma(I) 
 
_computing_data_collection        'Bruker APEX2'                                
_computing_cell_refinement        'Bruker SAINT'                                
_computing_data_reduction         'Bruker SAINT'                                
_computing_structure_solution     'SHELXS-97 (Sheldrick, 2008)' 
_computing_structure_refinement   'SHELXL-97 (Sheldrick, 2008)' 
_computing_molecular_graphics     'Bruker SHELXTL'                              
_computing_publication_material   'Bruker SHELXTL'                              
 
_refine_special_details 
; 
 Refinement of F^2^ against ALL reflections.  The weighted R-factor wR and 
 goodness of fit S are based on F^2^, conventional R-factors R are based 
 on F, with F set to zero for negative F^2^. The threshold expression of 
 F^2^ > 2sigma(F^2^) is used only for calculating R-factors(gt) etc. and is 
 not relevant to the choice of reflections for refinement.  R-factors based 
 on F^2^ are statistically about twice as large as those based on F, and R- 
 factors based on ALL data will be even larger. 
; 
 
_refine_ls_structure_factor_coef  Fsqd  
_refine_ls_matrix_type            full 
_refine_ls_weighting_scheme       calc  
_refine_ls_weighting_details 
 'calc w=1/[\s^2^(Fo^2^)+(0.0543P)^2^+0.6297P] where P=(Fo^2^+2Fc^2^)/3' 
_atom_sites_solution_primary      direct 
_atom_sites_solution_secondary    difmap 
_atom_sites_solution_hydrogens    geom 
_refine_ls_hydrogen_treatment     noref                                         
_refine_ls_extinction_method      none 
_refine_ls_extinction_coef        .                                             
_refine_ls_number_reflns          3384 
_refine_ls_number_parameters      236 
_refine_ls_number_restraints      0 
_refine_ls_R_factor_all           0.0435 
_refine_ls_R_factor_gt            0.0407 
_refine_ls_wR_factor_ref          0.1100 
_refine_ls_wR_factor_gt           0.1070 
_refine_ls_goodness_of_fit_ref    1.038 
_refine_ls_restrained_S_all       1.038 
_refine_ls_shift/su_max           0.001 
_refine_ls_shift/su_mean          0.000 
 
loop_ 
 _atom_site_label 
 _atom_site_type_symbol 
 _atom_site_fract_x 
 _atom_site_fract_y 
 _atom_site_fract_z 
 _atom_site_U_iso_or_equiv 
 _atom_site_adp_type 
 _atom_site_occupancy 
 _atom_site_symmetry_multiplicity 
 _atom_site_calc_flag 
 _atom_site_refinement_flags 
 _atom_site_disorder_assembly 
 _atom_site_disorder_group 
C123 C 0.82751(9) 0.89558(11) 0.98328(12) 0.0311(3) Uani 1 1 d . . . 
H12A H 0.8390 0.8528 0.9094 0.037 Uiso 1 1 calc R . . 
H12B H 0.8904 0.9231 1.0257 0.037 Uiso 1 1 calc R . . 
O2 O 0.75477(12) 1.24863(17) 0.7432(2) 0.1168(8) Uani 1 1 d . . . 
O3 O 0.71304(7) 0.67984(8) 0.89535(8) 0.0329(2) Uani 1 1 d . . . 
O4 O 0.75202(7) 0.88301(8) 1.16221(8) 0.0347(2) Uani 1 1 d . . . 
H4 H 0.7408 0.8401 1.2196 0.052 Uiso 1 1 calc R . . 
C100 C 0.78190(9) 0.80945(11) 1.06723(11) 0.0289(3) Uani 1 1 d . . . 
C124 C 0.76201(9) 1.00492(11) 0.94601(11) 0.0318(3) Uani 1 1 d . . . 
H2 H 0.7641 1.0571 1.0187 0.038 Uiso 1 1 calc R . . 
C1 C 1.02964(11) 0.59351(14) 1.23359(15) 0.0446(3) Uani 1 1 d . . . 
H1 H 1.0863 0.5528 1.2673 0.054 Uiso 1 1 calc R . . 
C2 C 1.00919(11) 0.70590(14) 1.27709(15) 0.0456(4) Uani 1 1 d . . . 
H2A H 1.0507 0.7412 1.3422 0.055 Uiso 1 1 calc R . . 
C3 C 0.92621(10) 0.76499(13) 1.22238(13) 0.0394(3) Uani 1 1 d . . . 
H3 H 0.9130 0.8407 1.2526 0.047 Uiso 1 1 calc R . . 
C4 C 0.86042(9) 0.71802(11) 1.12379(11) 0.0306(3) Uani 1 1 d . . . 
C5 C 0.80826(11) 1.07394(13) 0.84836(14) 0.0415(3) Uani 1 1 d . . . 
H5A H 0.8788 1.0640 0.8654 0.050 Uiso 1 1 calc R . . 
H5B H 0.7859 1.0385 0.7680 0.050 Uiso 1 1 calc R . . 
N600 N 0.78534(12) 1.20482(15) 0.84278(19) 0.0677(5) Uani 1 1 d . . . 
C7 C 0.96566(10) 0.54231(13) 1.14023(14) 0.0408(3) Uani 1 1 d . . . 
H7 H 0.9793 0.4654 1.1132 0.049 Uiso 1 1 calc R . . 
C8 C 0.88021(10) 0.60097(11) 1.08332(12) 0.0331(3) Uani 1 1 d . . . 
O O 0.8000(2) 1.26182(14) 0.9358(2) 0.1291(9) Uani 1 1 d . . . 
C10 C 0.65592(9) 0.96900(12) 0.90447(11) 0.0324(3) Uani 1 1 d . . . 
C11 C 0.58938(11) 1.05204(14) 0.84393(14) 0.0428(3) Uani 1 1 d . . . 
H11 H 0.6113 1.1288 0.8271 0.051 Uiso 1 1 calc R . . 
C12 C 0.49225(11) 1.02357(15) 0.80854(15) 0.0497(4) Uani 1 1 d . . . 
H12 H 0.4494 1.0806 0.7683 0.060 Uiso 1 1 calc R . . 
C13 C 0.45865(11) 0.91039(16) 0.83278(15) 0.0502(4) Uani 1 1 d . . . 
H13 H 0.3931 0.8905 0.8090 0.060 Uiso 1 1 calc R . . 
C14 C 0.52298(10) 0.82660(14) 0.89268(14) 0.0426(3) Uani 1 1 d . . . 
H14 H 0.5002 0.7500 0.9085 0.051 Uiso 1 1 calc R . . 
C15 C 0.62143(9) 0.85466(12) 0.92981(11) 0.0319(3) Uani 1 1 d . . . 
C16 C 0.68766(9) 0.75664(11) 0.99280(11) 0.0296(3) Uani 1 1 d . . . 
C17 C 0.72419(11) 0.55960(12) 0.94301(12) 0.0382(3) Uani 1 1 d . . . 
H17 H 0.7001 0.5013 0.8781 0.046 Uiso 1 1 calc R . . 
C18 C 0.65970(11) 0.55865(14) 1.04183(13) 0.0434(3) Uani 1 1 d . . . 
H18 H 0.6368 0.4896 1.0765 0.052 Uiso 1 1 calc R . . 
C19 C 0.64027(10) 0.66945(13) 1.07214(12) 0.0387(3) Uani 1 1 d . . . 
H19 H 0.6031 0.6911 1.1330 0.046 Uiso 1 1 calc R . . 
N200 N 0.82500(9) 0.53701(11) 0.98825(11) 0.0431(3) Uani 1 1 d . . . 
H20 H 0.8535 0.4798 0.9542 0.052 Uiso 1 1 calc R . . 
 
loop_ 
 _atom_site_aniso_label 
 _atom_site_aniso_U_11 
 _atom_site_aniso_U_22 
 _atom_site_aniso_U_33 
 _atom_site_aniso_U_23 
 _atom_site_aniso_U_13 
 _atom_site_aniso_U_12 
C123 0.0302(6) 0.0287(6) 0.0344(6) 0.0006(5) 0.0043(5) 0.0018(5) 
O2 0.0696(10) 0.1105(14) 0.1687(19) 0.1006(15) 0.0122(11) 0.0166(9) 
O3 0.0444(5) 0.0270(4) 0.0271(4) -0.0018(3) 0.0044(4) 0.0016(4) 
O4 0.0446(5) 0.0323(5) 0.0273(4) -0.0026(4) 0.0057(4) 0.0051(4) 
C100 0.0325(6) 0.0263(6) 0.0276(6) -0.0022(5) 0.0035(5) 0.0022(5) 
C124 0.0359(6) 0.0281(6) 0.0314(6) -0.0001(5) 0.0045(5) 0.0025(5) 
C1 0.0366(7) 0.0427(8) 0.0519(8) 0.0110(6) -0.0015(6) 0.0062(6) 
C2 0.0392(7) 0.0440(8) 0.0489(8) 0.0018(6) -0.0085(6) -0.0020(6) 
C3 0.0399(7) 0.0320(7) 0.0434(7) -0.0023(6) -0.0030(6) 0.0004(5) 
C4 0.0312(6) 0.0285(6) 0.0315(6) 0.0026(5) 0.0027(5) 0.0005(5) 
C5 0.0437(7) 0.0359(7) 0.0454(8) 0.0063(6) 0.0084(6) 0.0011(6) 
N600 0.0596(9) 0.0433(8) 0.1047(14) 0.0290(9) 0.0269(9) 0.0038(7) 
C7 0.0446(8) 0.0311(7) 0.0463(8) 0.0056(6) 0.0055(6) 0.0081(6) 
C8 0.0378(7) 0.0287(6) 0.0328(6) 0.0037(5) 0.0049(5) 0.0013(5) 
O 0.212(3) 0.0389(8) 0.1509(19) -0.0192(11) 0.0764(18) -0.0171(11) 
C10 0.0337(6) 0.0340(7) 0.0299(6) -0.0014(5) 0.0054(5) 0.0047(5) 
C11 0.0408(7) 0.0386(7) 0.0483(8) 0.0053(6) 0.0048(6) 0.0076(6) 
C12 0.0395(8) 0.0525(9) 0.0546(9) 0.0063(7) -0.0012(7) 0.0136(7) 
C13 0.0314(7) 0.0605(10) 0.0556(9) 0.0014(8) -0.0031(6) 0.0026(7) 
C14 0.0351(7) 0.0448(8) 0.0466(8) 0.0001(6) 0.0013(6) -0.0025(6) 
C15 0.0323(6) 0.0355(7) 0.0279(6) -0.0023(5) 0.0042(5) 0.0030(5) 
C16 0.0324(6) 0.0308(6) 0.0258(6) -0.0016(5) 0.0046(5) -0.0004(5) 
C17 0.0497(8) 0.0258(6) 0.0357(7) -0.0018(5) -0.0043(6) -0.0023(5) 
C18 0.0464(8) 0.0394(8) 0.0419(8) 0.0088(6) -0.0014(6) -0.0130(6) 
C19 0.0371(7) 0.0465(8) 0.0327(6) 0.0047(6) 0.0055(5) -0.0072(6) 
N200 0.0506(7) 0.0301(6) 0.0457(7) -0.0090(5) -0.0026(5) 0.0091(5) 
 
_geom_special_details 
; 
 All esds (except the esd in the dihedral angle between two l.s. planes) 
 are estimated using the full covariance matrix.  The cell esds are taken 
 into account individually in the estimation of esds in distances, angles 
 and torsion angles; correlations between esds in cell parameters are only 
 used when they are defined by crystal symmetry.  An approximate (isotropic) 
 treatment of cell esds is used for estimating esds involving l.s. planes. 
; 
 
loop_ 
 _geom_bond_atom_site_label_1 
 _geom_bond_atom_site_label_2 
 _geom_bond_distance 
 _geom_bond_site_symmetry_2 
 _geom_bond_publ_flag 
C123 C100 1.5241(17) . ? 
C123 C124 1.5300(17) . ? 
C123 H12A 0.9700 . ? 
C123 H12B 0.9700 . ? 
O2 N600 1.209(2) . ? 
O3 C17 1.4306(16) . ? 
O3 C16 1.4472(14) . ? 
O4 C100 1.4289(14) . ? 
O4 H4 0.8200 . ? 
C100 C16 1.5427(17) . ? 
C100 C4 1.5435(17) . ? 
C124 C10 1.5195(18) . ? 
C124 C5 1.5286(18) . ? 
C124 H2 0.9800 . ? 
C1 C7 1.369(2) . ? 
C1 C2 1.377(2) . ? 
C1 H1 0.9300 . ? 
C2 C3 1.3760(19) . ? 
C2 H2A 0.9300 . ? 
C3 C4 1.4018(18) . ? 
C3 H3 0.9300 . ? 
C4 C8 1.4103(18) . ? 
C5 N600 1.484(2) . ? 
C5 H5A 0.9700 . ? 
C5 H5B 0.9700 . ? 
N600 O 1.189(3) . ? 
C7 C8 1.4074(19) . ? 
C7 H7 0.9300 . ? 
C8 N200 1.3882(17) . ? 
C10 C11 1.3952(19) . ? 
C10 C15 1.3958(19) . ? 
C11 C12 1.375(2) . ? 
C11 H11 0.9300 . ? 
C12 C13 1.377(2) . ? 
C12 H12 0.9300 . ? 
C13 C14 1.380(2) . ? 
C13 H13 0.9300 . ? 
C14 C15 1.3937(19) . ? 
C14 H14 0.9300 . ? 
C15 C16 1.5170(17) . ? 
C16 C19 1.5113(17) . ? 
C17 N200 1.4271(18) . ? 
C17 C18 1.499(2) . ? 
C17 H17 0.9800 . ? 
C18 C19 1.310(2) . ? 
C18 H18 0.9300 . ? 
C19 H19 0.9300 . ? 
N200 H20 0.8600 . ? 
 
loop_ 
 _geom_angle_atom_site_label_1 
 _geom_angle_atom_site_label_2 
 _geom_angle_atom_site_label_3 
 _geom_angle 
 _geom_angle_site_symmetry_1 
 _geom_angle_site_symmetry_3 
 _geom_angle_publ_flag 
C100 C123 C124 112.07(10) . . ? 
C100 C123 H12A 109.2 . . ? 
C124 C123 H12A 109.2 . . ? 
C100 C123 H12B 109.2 . . ? 
C124 C123 H12B 109.2 . . ? 
H12A C123 H12B 107.9 . . ? 
C17 O3 C16 107.70(9) . . ? 
C100 O4 H4 109.5 . . ? 
O4 C100 C123 105.71(10) . . ? 
O4 C100 C16 106.74(9) . . ? 
C123 C100 C16 108.12(10) . . ? 
O4 C100 C4 110.16(9) . . ? 
C123 C100 C4 108.92(10) . . ? 
C16 C100 C4 116.64(10) . . ? 
C10 C124 C5 113.98(11) . . ? 
C10 C124 C123 112.12(10) . . ? 
C5 C124 C123 106.89(10) . . ? 
C10 C124 H2 107.9 . . ? 
C5 C124 H2 107.9 . . ? 
C123 C124 H2 107.9 . . ? 
C7 C1 C2 119.32(13) . . ? 
C7 C1 H1 120.3 . . ? 
C2 C1 H1 120.3 . . ? 
C3 C2 C1 118.70(13) . . ? 
C3 C2 H2A 120.6 . . ? 
C1 C2 H2A 120.6 . . ? 
C2 C3 C4 123.98(13) . . ? 
C2 C3 H3 118.0 . . ? 
C4 C3 H3 118.0 . . ? 
C3 C4 C8 116.70(12) . . ? 
C3 C4 C100 113.55(11) . . ? 
C8 C4 C100 129.43(11) . . ? 
N600 C5 C124 114.15(13) . . ? 
N600 C5 H5A 108.7 . . ? 
C124 C5 H5A 108.7 . . ? 
N600 C5 H5B 108.7 . . ? 
C124 C5 H5B 108.7 . . ? 
H5A C5 H5B 107.6 . . ? 
O N600 O2 123.3(2) . . ? 
O N600 C5 118.43(18) . . ? 
O2 N600 C5 118.2(2) . . ? 
C1 C7 C8 122.87(13) . . ? 
C1 C7 H7 118.6 . . ? 
C8 C7 H7 118.6 . . ? 
N200 C8 C7 115.16(12) . . ? 
N200 C8 C4 126.46(12) . . ? 
C7 C8 C4 118.34(12) . . ? 
C11 C10 C15 118.24(12) . . ? 
C11 C10 C124 120.36(12) . . ? 
C15 C10 C124 121.35(11) . . ? 
C12 C11 C10 121.80(14) . . ? 
C12 C11 H11 119.1 . . ? 
C10 C11 H11 119.1 . . ? 
C11 C12 C13 119.81(14) . . ? 
C11 C12 H12 120.1 . . ? 
C13 C12 H12 120.1 . . ? 
C12 C13 C14 119.54(14) . . ? 
C12 C13 H13 120.2 . . ? 
C14 C13 H13 120.2 . . ? 
C13 C14 C15 121.20(14) . . ? 
C13 C14 H14 119.4 . . ? 
C15 C14 H14 119.4 . . ? 
C14 C15 C10 119.41(12) . . ? 
C14 C15 C16 117.87(12) . . ? 
C10 C15 C16 122.68(11) . . ? 
O3 C16 C19 102.71(10) . . ? 
O3 C16 C15 106.40(9) . . ? 
C19 C16 C15 115.81(11) . . ? 
O3 C16 C100 109.51(9) . . ? 
C19 C16 C100 110.03(10) . . ? 
C15 C16 C100 111.79(10) . . ? 
N200 C17 O3 109.63(11) . . ? 
N200 C17 C18 113.68(12) . . ? 
O3 C17 C18 103.06(11) . . ? 
N200 C17 H17 110.1 . . ? 
O3 C17 H17 110.1 . . ? 
C18 C17 H17 110.1 . . ? 
C19 C18 C17 110.00(12) . . ? 
C19 C18 H18 125.0 . . ? 
C17 C18 H18 125.0 . . ? 
C18 C19 C16 109.35(12) . . ? 
C18 C19 H19 125.3 . . ? 
C16 C19 H19 125.3 . . ? 
C8 N200 C17 124.58(11) . . ? 
C8 N200 H20 117.7 . . ? 
C17 N200 H20 117.7 . . ? 
 
_diffrn_measured_fraction_theta_max    1.000 
_diffrn_reflns_theta_full              26.38 
_diffrn_measured_fraction_theta_full   1.000 
_refine_diff_density_max    0.282 
_refine_diff_density_min   -0.243 
_refine_diff_density_rms    0.038 
#END
data_publication_text
_publ_contact_author_name        'Andrei Kutateladze'
_publ_contact_author_address     
;Department of Chemistry and Biochemistry
University of Denver
FW Olin Hall, 202
2190 E. Iliff Ave
Denver, CO 80208
;
_publ_contact_author_email       akutatel.edu
_publ_contact_author_phone       303-871-2995
_publ_contact_author_fax         303-871-2254
loop_
_publ_author_name
_publ_author_address
'Kutateladze, A.G.'
;Department of Chemistry and Biochemistry
University of Denver
FW Olin Hall, 202
2190 E. Iliff Ave
Denver, CO 80208
;
_publ_requested_journal          'Private Communication'
 
data_compound_40_oam40489 
 
_audit_creation_method            SHELXL-97 
_chemical_name_systematic         .                                             
_chemical_name_common             .                                             
_chemical_absolute_configuration  .                                             
_chemical_melting_point           .                                             
_chemical_formula_moiety           'C20 H18 N2 O4'                              
_chemical_formula_sum 
 'C20 H18 N2 O4' 
_chemical_formula_weight          350.36 
 
loop_ 
 _atom_type_symbol 
 _atom_type_description 
 _atom_type_scat_dispersion_real 
 _atom_type_scat_dispersion_imag 
 _atom_type_scat_source 
 'C'  'C'   0.0033   0.0016 
 'International Tables Vol C Tables 4.2.6.8 and 6.1.1.4' 
 'H'  'H'   0.0000   0.0000 
 'International Tables Vol C Tables 4.2.6.8 and 6.1.1.4' 
 'N'  'N'   0.0061   0.0033 
 'International Tables Vol C Tables 4.2.6.8 and 6.1.1.4' 
 'O'  'O'   0.0106   0.0060 
 'International Tables Vol C Tables 4.2.6.8 and 6.1.1.4' 
 
_symmetry_cell_setting            'Monoclinic'                                  
_symmetry_space_group_name_H-M    'P2(1)/n  '                                   
 
loop_ 
 _symmetry_equiv_pos_as_xyz 
 'x, y, z' 
 '-x+1/2, y+1/2, -z+1/2' 
 '-x, -y, -z' 
 'x-1/2, -y-1/2, z-1/2' 
 
_cell_length_a                    7.4392(2) 
_cell_length_b                    21.5625(6) 
_cell_length_c                    10.4467(3) 
_cell_angle_alpha                 90.00 
_cell_angle_beta                  101.7440(10) 
_cell_angle_gamma                 90.00 
_cell_volume                      1640.65(8) 
_cell_formula_units_Z             4 
_cell_measurement_temperature     296(2) 
_cell_measurement_reflns_used     9678                                          
_cell_measurement_theta_min       2.20                                          
_cell_measurement_theta_max       28.17                                         
 
_exptl_crystal_description        'rectangular'                                 
_exptl_crystal_colour             'colourless'                                  
_exptl_crystal_size_max           0.50 
_exptl_crystal_size_mid           0.50 
_exptl_crystal_size_min           0.20 
_exptl_crystal_density_meas       .                                             
_exptl_crystal_density_diffrn     1.418 
_exptl_crystal_density_method     'not measured' 
_exptl_crystal_F_000              736 
_exptl_absorpt_coefficient_mu     0.100 
_exptl_absorpt_correction_type    multi-scan                                    
_exptl_absorpt_correction_T_min   0.9517 
_exptl_absorpt_correction_T_max   0.9803 
_exptl_absorpt_process_details    ? 
 
_exptl_special_details 
; 
 ? 
; 
 
_diffrn_ambient_temperature       296(2) 
_diffrn_radiation_wavelength      0.71073 
_diffrn_radiation_type            MoK\a 
_diffrn_radiation_source          'fine-focus sealed tube' 
_diffrn_radiation_monochromator   graphite 
_diffrn_measurement_device_type   'Bruker D8 APEX II Diffractometer'            
_diffrn_measurement_method        '\f and \w scans'                             
_diffrn_detector_area_resol_mean  8.33                                          
_diffrn_reflns_number             101727 
_diffrn_reflns_av_R_equivalents   0.0266 
_diffrn_reflns_av_sigmaI/netI     0.0047 
_diffrn_reflns_limit_h_min        -9 
_diffrn_reflns_limit_h_max        9 
_diffrn_reflns_limit_k_min        -26 
_diffrn_reflns_limit_k_max        26 
_diffrn_reflns_limit_l_min        -12 
_diffrn_reflns_limit_l_max        12 
_diffrn_reflns_theta_min          1.89 
_diffrn_reflns_theta_max          25.69 
_reflns_number_total              3105 
_reflns_number_gt                 2999 
_reflns_threshold_expression      >2sigma(I) 
 
_computing_data_collection        'Bruker APEX2'                                
_computing_cell_refinement        'Bruker SAINT'                                
_computing_data_reduction         'Bruker SAINT'                                
_computing_structure_solution     'SHELXS-97 (Sheldrick, 2008)' 
_computing_structure_refinement   'SHELXL-97 (Sheldrick, 2008)' 
_computing_molecular_graphics     'Bruker SHELXTL'                              
_computing_publication_material   'Bruker SHELXTL'                              
 
_refine_special_details 
; 
 Refinement of F^2^ against ALL reflections.  The weighted R-factor wR and 
 goodness of fit S are based on F^2^, conventional R-factors R are based 
 on F, with F set to zero for negative F^2^. The threshold expression of 
 F^2^ > 2sigma(F^2^) is used only for calculating R-factors(gt) etc. and is 
 not relevant to the choice of reflections for refinement.  R-factors based 
 on F^2^ are statistically about twice as large as those based on F, and R- 
 factors based on ALL data will be even larger. 
; 
 
_refine_ls_structure_factor_coef  Fsqd  
_refine_ls_matrix_type            full 
_refine_ls_weighting_scheme       calc  
_refine_ls_weighting_details 
 'calc w=1/[\s^2^(Fo^2^)+(0.0612P)^2^+0.6403P] where P=(Fo^2^+2Fc^2^)/3' 
_atom_sites_solution_primary      direct 
_atom_sites_solution_secondary    difmap 
_atom_sites_solution_hydrogens    geom 
_refine_ls_hydrogen_treatment     .                                             
_refine_ls_extinction_method      none 
_refine_ls_extinction_coef        .                                             
_refine_ls_number_reflns          3105 
_refine_ls_number_parameters      236 
_refine_ls_number_restraints      0 
_refine_ls_R_factor_all           0.0412 
_refine_ls_R_factor_gt            0.0403 
_refine_ls_wR_factor_ref          0.1106 
_refine_ls_wR_factor_gt           0.1096 
_refine_ls_goodness_of_fit_ref    1.005 
_refine_ls_restrained_S_all       1.005 
_refine_ls_shift/su_max           0.000 
_refine_ls_shift/su_mean          0.000 
 
loop_ 
 _atom_site_label 
 _atom_site_type_symbol 
 _atom_site_fract_x 
 _atom_site_fract_y 
 _atom_site_fract_z 
 _atom_site_U_iso_or_equiv 
 _atom_site_adp_type 
 _atom_site_occupancy 
 _atom_site_symmetry_multiplicity 
 _atom_site_calc_flag 
 _atom_site_refinement_flags 
 _atom_site_disorder_assembly 
 _atom_site_disorder_group 
C300 C 0.25294(19) 0.11947(6) 0.34153(13) 0.0336(3) Uani 1 1 d . . . 
H30A H 0.3548 0.0910 0.3453 0.040 Uiso 1 1 calc R . . 
H30B H 0.2125 0.1167 0.4240 0.040 Uiso 1 1 calc R . . 
O2 O 0.3882(2) 0.21672(8) 0.60335(13) 0.0753(4) Uani 1 1 d . . . 
O3 O -0.03747(12) 0.14879(4) 0.21966(10) 0.0349(2) Uani 1 1 d . . . 
O4 O 0.28711(13) 0.04612(4) 0.10006(10) 0.0383(2) Uani 1 1 d . . . 
H4 H 0.2260 0.0144 0.0845 0.057 Uiso 1 1 calc R . . 
C100 C 0.31901(18) 0.18523(6) 0.32472(13) 0.0332(3) Uani 1 1 d . . . 
H1 H 0.2295 0.2146 0.3470 0.040 Uiso 1 1 calc R . . 
C200 C 0.09690(17) 0.09995(6) 0.23175(12) 0.0294(3) Uani 1 1 d . . . 
O123 O 0.5633(2) 0.13779(8) 0.61076(16) 0.0816(5) Uani 1 1 d . . . 
N124 N 0.48612(18) 0.18267(7) 0.55517(13) 0.0482(3) Uani 1 1 d . . . 
C3 C 0.5044(2) 0.19532(8) 0.41834(15) 0.0445(4) Uani 1 1 d . . . 
H3A H 0.5957 0.1679 0.3948 0.053 Uiso 1 1 calc R . . 
H3B H 0.5448 0.2377 0.4112 0.053 Uiso 1 1 calc R . . 
C4 C 0.01036(18) 0.03928(6) 0.26372(13) 0.0318(3) Uani 1 1 d . . . 
C5 C -0.18232(19) 0.03426(7) 0.24214(14) 0.0365(3) Uani 1 1 d . . . 
C6 C -0.2616(2) -0.02067(7) 0.27542(15) 0.0440(4) Uani 1 1 d . . . 
H6 H -0.3887 -0.0245 0.2595 0.053 Uiso 1 1 calc R . . 
C7 C -0.1537(2) -0.06906(7) 0.33133(15) 0.0466(4) Uani 1 1 d . . . 
H7 H -0.2083 -0.1055 0.3522 0.056 Uiso 1 1 calc R . . 
C8 C -0.20201(19) 0.13230(7) 0.13176(15) 0.0404(3) Uani 1 1 d . . . 
H8 H -0.2825 0.1687 0.1165 0.048 Uiso 1 1 calc R . . 
N125 N -0.29178(16) 0.08425(6) 0.19330(14) 0.0458(3) Uani 1 1 d . . . 
H9 H -0.4053 0.0867 0.1990 0.055 Uiso 1 1 calc R . . 
C10 C 0.0354(2) -0.06412(7) 0.35694(15) 0.0461(4) Uani 1 1 d . . . 
H10 H 0.1082 -0.0966 0.3967 0.055 Uiso 1 1 calc R . . 
C11 C 0.1154(2) -0.01024(7) 0.32268(14) 0.0380(3) Uani 1 1 d . . . 
H11 H 0.2427 -0.0071 0.3395 0.046 Uiso 1 1 calc R . . 
C12 C -0.1632(2) 0.11090(7) 0.00335(15) 0.0418(3) Uani 1 1 d . . . 
H12 H -0.2591 0.1094 -0.0692 0.050 Uiso 1 1 calc R . . 
C13 C 0.0027(2) 0.09409(6) -0.00990(14) 0.0373(3) Uani 1 1 d . . . 
H13 H 0.0189 0.0793 -0.0904 0.045 Uiso 1 1 calc R . . 
C14 C 0.16709(17) 0.09810(6) 0.10189(13) 0.0297(3) Uani 1 1 d . . . 
C15 C 0.28018(17) 0.15569(6) 0.08505(13) 0.0300(3) Uani 1 1 d . . . 
C16 C 0.31901(19) 0.16720(7) -0.03843(14) 0.0365(3) Uani 1 1 d . . . 
H16 H 0.2850 0.1380 -0.1045 0.044 Uiso 1 1 calc R . . 
C17 C 0.4065(2) 0.22076(7) -0.06433(15) 0.0402(3) Uani 1 1 d . . . 
H17 H 0.4323 0.2274 -0.1467 0.048 Uiso 1 1 calc R . . 
C18 C 0.4552(2) 0.26443(7) 0.03316(15) 0.0403(3) Uani 1 1 d . . . 
H18 H 0.5083 0.3017 0.0155 0.048 Uiso 1 1 calc R . . 
C19 C 0.42505(19) 0.25278(6) 0.15657(15) 0.0378(3) Uani 1 1 d . . . 
H19 H 0.4612 0.2821 0.2221 0.045 Uiso 1 1 calc R . . 
C20 C 0.34113(17) 0.19784(6) 0.18584(13) 0.0311(3) Uani 1 1 d . . . 
 
loop_ 
 _atom_site_aniso_label 
 _atom_site_aniso_U_11 
 _atom_site_aniso_U_22 
 _atom_site_aniso_U_33 
 _atom_site_aniso_U_23 
 _atom_site_aniso_U_13 
 _atom_site_aniso_U_12 
C300 0.0324(7) 0.0363(7) 0.0312(6) -0.0013(5) 0.0046(5) -0.0053(5) 
O2 0.0896(11) 0.0889(10) 0.0488(7) -0.0215(7) 0.0175(7) 0.0044(9) 
O3 0.0286(5) 0.0302(5) 0.0459(6) -0.0038(4) 0.0074(4) 0.0018(4) 
O4 0.0346(5) 0.0296(5) 0.0524(6) -0.0056(4) 0.0128(4) 0.0012(4) 
C100 0.0299(6) 0.0345(7) 0.0354(7) -0.0067(5) 0.0075(5) -0.0051(5) 
C200 0.0251(6) 0.0284(6) 0.0344(7) -0.0015(5) 0.0058(5) -0.0003(5) 
O123 0.0665(9) 0.0978(12) 0.0770(10) 0.0324(9) 0.0062(7) 0.0088(8) 
N124 0.0397(7) 0.0595(8) 0.0416(7) -0.0049(6) -0.0009(6) -0.0143(6) 
C3 0.0364(8) 0.0558(9) 0.0403(8) -0.0056(7) 0.0058(6) -0.0152(7) 
C4 0.0311(6) 0.0319(7) 0.0325(6) -0.0022(5) 0.0072(5) -0.0043(5) 
C5 0.0325(7) 0.0393(7) 0.0388(7) -0.0037(6) 0.0102(6) -0.0045(6) 
C6 0.0391(8) 0.0505(9) 0.0445(8) -0.0036(7) 0.0134(6) -0.0151(7) 
C7 0.0616(10) 0.0420(8) 0.0382(8) 0.0013(6) 0.0148(7) -0.0184(7) 
C8 0.0267(7) 0.0378(7) 0.0552(9) 0.0016(6) 0.0050(6) 0.0037(5) 
N125 0.0244(6) 0.0484(7) 0.0655(8) 0.0026(6) 0.0113(5) -0.0003(5) 
C10 0.0580(10) 0.0369(8) 0.0419(8) 0.0063(6) 0.0067(7) -0.0041(7) 
C11 0.0375(7) 0.0365(7) 0.0386(7) 0.0018(6) 0.0044(6) -0.0029(6) 
C12 0.0327(7) 0.0432(8) 0.0442(8) 0.0044(6) -0.0047(6) -0.0042(6) 
C13 0.0377(7) 0.0396(8) 0.0330(7) -0.0029(5) 0.0034(6) -0.0082(6) 
C14 0.0269(6) 0.0283(6) 0.0337(7) -0.0032(5) 0.0058(5) -0.0004(5) 
C15 0.0248(6) 0.0298(6) 0.0357(7) 0.0003(5) 0.0067(5) 0.0016(5) 
C16 0.0347(7) 0.0393(7) 0.0358(7) -0.0026(6) 0.0081(5) -0.0007(6) 
C17 0.0369(7) 0.0459(8) 0.0399(7) 0.0073(6) 0.0128(6) 0.0008(6) 
C18 0.0362(7) 0.0334(7) 0.0528(9) 0.0069(6) 0.0127(6) -0.0027(6) 
C19 0.0354(7) 0.0315(7) 0.0465(8) -0.0035(6) 0.0084(6) -0.0034(5) 
C20 0.0261(6) 0.0302(6) 0.0372(7) -0.0013(5) 0.0072(5) -0.0002(5) 
 
_geom_special_details 
; 
 All esds (except the esd in the dihedral angle between two l.s. planes) 
 are estimated using the full covariance matrix.  The cell esds are taken 
 into account individually in the estimation of esds in distances, angles 
 and torsion angles; correlations between esds in cell parameters are only 
 used when they are defined by crystal symmetry.  An approximate (isotropic) 
 treatment of cell esds is used for estimating esds involving l.s. planes. 
; 
 
loop_ 
 _geom_bond_atom_site_label_1 
 _geom_bond_atom_site_label_2 
 _geom_bond_distance 
 _geom_bond_site_symmetry_2 
 _geom_bond_publ_flag 
C300 C200 1.5160(17) . ? 
C300 C100 1.5225(18) . ? 
C300 H30A 0.9700 . ? 
C300 H30B 0.9700 . ? 
O2 N124 1.213(2) . ? 
O3 C8 1.4179(17) . ? 
O3 C200 1.4398(15) . ? 
O4 C14 1.4355(15) . ? 
O4 H4 0.8200 . ? 
C100 C20 1.5176(18) . ? 
C100 C3 1.5351(19) . ? 
C100 H1 0.9800 . ? 
C200 C4 1.5246(17) . ? 
C200 C14 1.5502(18) . ? 
O123 N124 1.211(2) . ? 
N124 C3 1.488(2) . ? 
C3 H3A 0.9700 . ? 
C3 H3B 0.9700 . ? 
C4 C11 1.391(2) . ? 
C4 C5 1.4091(19) . ? 
C5 N125 1.3841(19) . ? 
C5 C6 1.398(2) . ? 
C6 C7 1.372(2) . ? 
C6 H6 0.9300 . ? 
C7 C10 1.381(2) . ? 
C7 H7 0.9300 . ? 
C8 N125 1.4518(19) . ? 
C8 C12 1.501(2) . ? 
C8 H8 0.9800 . ? 
N125 H9 0.8600 . ? 
C10 C11 1.385(2) . ? 
C10 H10 0.9300 . ? 
C11 H11 0.9300 . ? 
C12 C13 1.320(2) . ? 
C12 H12 0.9300 . ? 
C13 C14 1.5120(18) . ? 
C13 H13 0.9300 . ? 
C14 C15 1.5300(17) . ? 
C15 C20 1.3949(18) . ? 
C15 C16 1.4002(19) . ? 
C16 C17 1.379(2) . ? 
C16 H16 0.9300 . ? 
C17 C18 1.380(2) . ? 
C17 H17 0.9300 . ? 
C18 C19 1.376(2) . ? 
C18 H18 0.9300 . ? 
C19 C20 1.4015(19) . ? 
C19 H19 0.9300 . ? 
 
loop_ 
 _geom_angle_atom_site_label_1 
 _geom_angle_atom_site_label_2 
 _geom_angle_atom_site_label_3 
 _geom_angle 
 _geom_angle_site_symmetry_1 
 _geom_angle_site_symmetry_3 
 _geom_angle_publ_flag 
C200 C300 C100 112.76(11) . . ? 
C200 C300 H30A 109.0 . . ? 
C100 C300 H30A 109.0 . . ? 
C200 C300 H30B 109.0 . . ? 
C100 C300 H30B 109.0 . . ? 
H30A C300 H30B 107.8 . . ? 
C8 O3 C200 111.45(10) . . ? 
C14 O4 H4 109.5 . . ? 
C300 C100 C20 112.18(11) . . ? 
C300 C100 C3 109.13(12) . . ? 
C20 C100 C3 109.00(11) . . ? 
C300 C100 H1 108.8 . . ? 
C20 C100 H1 108.8 . . ? 
C3 C100 H1 108.8 . . ? 
O3 C200 C300 105.92(10) . . ? 
O3 C200 C4 109.28(10) . . ? 
C300 C200 C4 111.41(11) . . ? 
O3 C200 C14 107.07(10) . . ? 
C300 C200 C14 109.07(10) . . ? 
C4 C200 C14 113.71(10) . . ? 
O123 N124 O2 123.40(16) . . ? 
O123 N124 C3 118.68(16) . . ? 
O2 N124 C3 117.86(15) . . ? 
N124 C3 C100 109.89(11) . . ? 
N124 C3 H3A 109.7 . . ? 
C100 C3 H3A 109.7 . . ? 
N124 C3 H3B 109.7 . . ? 
C100 C3 H3B 109.7 . . ? 
H3A C3 H3B 108.2 . . ? 
C11 C4 C5 118.26(12) . . ? 
C11 C4 C200 122.11(12) . . ? 
C5 C4 C200 119.47(12) . . ? 
N125 C5 C6 120.34(13) . . ? 
N125 C5 C4 120.14(12) . . ? 
C6 C5 C4 119.46(13) . . ? 
C7 C6 C5 120.69(14) . . ? 
C7 C6 H6 119.7 . . ? 
C5 C6 H6 119.7 . . ? 
C6 C7 C10 120.53(14) . . ? 
C6 C7 H7 119.7 . . ? 
C10 C7 H7 119.7 . . ? 
O3 C8 N125 107.85(12) . . ? 
O3 C8 C12 110.97(11) . . ? 
N125 C8 C12 111.47(12) . . ? 
O3 C8 H8 108.8 . . ? 
N125 C8 H8 108.8 . . ? 
C12 C8 H8 108.8 . . ? 
C5 N125 C8 115.45(11) . . ? 
C5 N125 H9 122.3 . . ? 
C8 N125 H9 122.3 . . ? 
C7 C10 C11 119.25(15) . . ? 
C7 C10 H10 120.4 . . ? 
C11 C10 H10 120.4 . . ? 
C4 C11 C10 121.75(14) . . ? 
C4 C11 H11 119.1 . . ? 
C10 C11 H11 119.1 . . ? 
C13 C12 C8 122.15(13) . . ? 
C13 C12 H12 118.9 . . ? 
C8 C12 H12 118.9 . . ? 
C12 C13 C14 121.99(13) . . ? 
C12 C13 H13 119.0 . . ? 
C14 C13 H13 119.0 . . ? 
O4 C14 C13 110.65(11) . . ? 
O4 C14 C15 105.91(10) . . ? 
C13 C14 C15 109.57(11) . . ? 
O4 C14 C200 110.66(10) . . ? 
C13 C14 C200 108.28(10) . . ? 
C15 C14 C200 111.77(10) . . ? 
C20 C15 C16 118.92(12) . . ? 
C20 C15 C14 122.95(12) . . ? 
C16 C15 C14 118.10(12) . . ? 
C17 C16 C15 121.54(13) . . ? 
C17 C16 H16 119.2 . . ? 
C15 C16 H16 119.2 . . ? 
C16 C17 C18 119.34(13) . . ? 
C16 C17 H17 120.3 . . ? 
C18 C17 H17 120.3 . . ? 
C19 C18 C17 119.90(13) . . ? 
C19 C18 H18 120.0 . . ? 
C17 C18 H18 120.0 . . ? 
C18 C19 C20 121.56(13) . . ? 
C18 C19 H19 119.2 . . ? 
C20 C19 H19 119.2 . . ? 
C15 C20 C19 118.48(12) . . ? 
C15 C20 C100 121.54(11) . . ? 
C19 C20 C100 119.98(12) . . ? 
 
_diffrn_measured_fraction_theta_max    0.999 
_diffrn_reflns_theta_full              25.69 
_diffrn_measured_fraction_theta_full   0.999 
_refine_diff_density_max    0.437 
_refine_diff_density_min   -0.429 
_refine_diff_density_rms    0.044 
#END
ata_publication_text
_publ_contact_author_name        'Andrei Kutateladze'
_publ_contact_author_address     
;Department of Chemistry and Biochemistry
University of Denver
FW Olin Hall, 202
2190 E. Iliff Ave
Denver, CO 80208
;
_publ_contact_author_email       akutatel.edu
_publ_contact_author_phone       303-871-2995
_publ_contact_author_fax         303-871-2254
loop_
_publ_author_name
_publ_author_address
'Kutateladze, A.G.'
;Department of Chemistry and Biochemistry
University of Denver
FW Olin Hall, 202
2190 E. Iliff Ave
Denver, CO 80208
;
_publ_requested_journal          'Private Communication'
 
data_compound_70_oam40567_0m 
 
_audit_creation_method            SHELXL-97 
_chemical_name_systematic         .                                             
_chemical_name_common             .                                             
_chemical_absolute_configuration  .                                             
_chemical_melting_point           .                                             
_chemical_formula_moiety           'C17 H18 N O2'                               
_chemical_formula_sum 
 'C17 H18 N O2' 
_chemical_formula_weight          268.32 
 
loop_ 
 _atom_type_symbol 
 _atom_type_description 
 _atom_type_scat_dispersion_real 
 _atom_type_scat_dispersion_imag 
 _atom_type_scat_source 
 'C'  'C'   0.0033   0.0016 
 'International Tables Vol C Tables 4.2.6.8 and 6.1.1.4' 
 'H'  'H'   0.0000   0.0000 
 'International Tables Vol C Tables 4.2.6.8 and 6.1.1.4' 
 'N'  'N'   0.0061   0.0033 
 'International Tables Vol C Tables 4.2.6.8 and 6.1.1.4' 
 'O'  'O'   0.0106   0.0060 
 'International Tables Vol C Tables 4.2.6.8 and 6.1.1.4' 
 
_symmetry_cell_setting            'Monoclinic'                                  
_symmetry_space_group_name_H-M    'P2(1)   '                                    
 
loop_ 
 _symmetry_equiv_pos_as_xyz 
 'x, y, z' 
 '-x, y+1/2, -z' 
 
_cell_length_a                    8.0631(2) 
_cell_length_b                    6.9110(2) 
_cell_length_c                    12.3303(3) 
_cell_angle_alpha                 90.00 
_cell_angle_beta                  92.6910(10) 
_cell_angle_gamma                 90.00 
_cell_volume                      686.34(3) 
_cell_formula_units_Z             2 
_cell_measurement_temperature     296(2) 
_cell_measurement_reflns_used     9957                                          
_cell_measurement_theta_min       2.53                                          
_cell_measurement_theta_max       28.01                                         
 
_exptl_crystal_description        'rectangular'                                 
_exptl_crystal_colour             'colourless'                                  
_exptl_crystal_size_max           0.50 
_exptl_crystal_size_mid           0.12 
_exptl_crystal_size_min           0.12 
_exptl_crystal_density_meas       .                                             
_exptl_crystal_density_diffrn     1.298 
_exptl_crystal_density_method     'not measured' 
_exptl_crystal_F_000              286 
_exptl_absorpt_coefficient_mu     0.085 
_exptl_absorpt_correction_type    multi-scan                                    
_exptl_absorpt_correction_T_min   0.9588 
_exptl_absorpt_correction_T_max   0.9899 
_exptl_absorpt_process_details    ? 
 
_exptl_special_details 
; 
 ? 
; 
 
_diffrn_ambient_temperature       296(2) 
_diffrn_radiation_wavelength      0.71073 
_diffrn_radiation_type            MoK\a 
_diffrn_radiation_source          'fine-focus sealed tube' 
_diffrn_radiation_monochromator   graphite 
_diffrn_measurement_device_type   'Bruker D8 APEX II Diffractometer'            
_diffrn_measurement_method        '\f and \w scans'                             
_diffrn_detector_area_resol_mean  8.33                                          
_diffrn_reflns_number             22627 
_diffrn_reflns_av_R_equivalents   0.0240 
_diffrn_reflns_av_sigmaI/netI     0.0104 
_diffrn_reflns_limit_h_min        -10 
_diffrn_reflns_limit_h_max        10 
_diffrn_reflns_limit_k_min        -8 
_diffrn_reflns_limit_k_max        8 
_diffrn_reflns_limit_l_min        -15 
_diffrn_reflns_limit_l_max        15 
_diffrn_reflns_theta_min          1.65 
_diffrn_reflns_theta_max          26.37 
_reflns_number_total              2794 
_reflns_number_gt                 2675 
_reflns_threshold_expression      >2sigma(I) 
 
_computing_data_collection        'Bruker APEX2'                                
_computing_cell_refinement        'Bruker SAINT'                                
_computing_data_reduction         'Bruker SAINT'                                
_computing_structure_solution     'SHELXS-97 (Sheldrick, 2008)' 
_computing_structure_refinement   'SHELXL-97 (Sheldrick, 2008)' 
_computing_molecular_graphics     'Bruker SHELXTL'                              
_computing_publication_material   'Bruker SHELXTL'                              
 
_refine_special_details 
; 
 Refinement of F^2^ against ALL reflections.  The weighted R-factor wR and 
 goodness of fit S are based on F^2^, conventional R-factors R are based 
 on F, with F set to zero for negative F^2^. The threshold expression of 
 F^2^ > 2sigma(F^2^) is used only for calculating R-factors(gt) etc. and is 
 not relevant to the choice of reflections for refinement.  R-factors based 
 on F^2^ are statistically about twice as large as those based on F, and R- 
 factors based on ALL data will be even larger. 
; 
 
_refine_ls_structure_factor_coef  Fsqd  
_refine_ls_matrix_type            full 
_refine_ls_weighting_scheme       calc  
_refine_ls_weighting_details 
 'calc w=1/[\s^2^(Fo^2^)+(0.0784P)^2^+0.0976P] where P=(Fo^2^+2Fc^2^)/3' 
_atom_sites_solution_primary      direct 
_atom_sites_solution_secondary    difmap 
_atom_sites_solution_hydrogens    geom 
_refine_ls_hydrogen_treatment     .                                             
_refine_ls_extinction_method      none 
_refine_ls_extinction_coef        .                                             
_refine_ls_abs_structure_details 
 'Flack H D (1983), Acta Cryst. A39, 876-881' 
_refine_ls_abs_structure_Flack    0.5(13) 
_refine_ls_number_reflns          2794 
_refine_ls_number_parameters      182 
_refine_ls_number_restraints      1 
_refine_ls_R_factor_all           0.0440 
_refine_ls_R_factor_gt            0.0424 
_refine_ls_wR_factor_ref          0.1212 
_refine_ls_wR_factor_gt           0.1187 
_refine_ls_goodness_of_fit_ref    1.050 
_refine_ls_restrained_S_all       1.050 
_refine_ls_shift/su_max           0.000 
_refine_ls_shift/su_mean          0.000 
 
loop_ 
 _atom_site_label 
 _atom_site_type_symbol 
 _atom_site_fract_x 
 _atom_site_fract_y 
 _atom_site_fract_z 
 _atom_site_U_iso_or_equiv 
 _atom_site_adp_type 
 _atom_site_occupancy 
 _atom_site_symmetry_multiplicity 
 _atom_site_calc_flag 
 _atom_site_refinement_flags 
 _atom_site_disorder_assembly 
 _atom_site_disorder_group 
O1 O 1.0186(2) 0.6783(2) 0.49819(13) 0.0650(4) Uani 1 1 d . . . 
H1 H 1.0302 0.7679 0.4556 0.098 Uiso 1 1 calc R . . 
O2 O 0.89780(13) 0.43176(16) 0.67543(9) 0.0384(3) Uani 1 1 d . . . 
N1 N 0.66551(18) 0.4967(2) 0.78246(12) 0.0443(3) Uani 1 1 d . . . 
C1 C 0.9183(2) 0.7405(3) 0.58419(13) 0.0446(4) Uani 1 1 d . . . 
H1A H 0.9384 0.8783 0.5982 0.054 Uiso 1 1 calc R . . 
C2 C 0.96560(19) 0.6244(2) 0.68783(12) 0.0362(3) Uani 1 1 d . . . 
C3 C 0.7201(2) 0.4338(3) 0.67750(14) 0.0437(4) Uani 1 1 d . . . 
C4 C 0.5995(4) 0.3374(4) 0.8415(2) 0.0762(7) Uani 1 1 d . . . 
H4A H 0.5067 0.3790 0.8831 0.091 Uiso 1 1 calc R . . 
H4B H 0.6839 0.2820 0.8908 0.091 Uiso 1 1 calc R . . 
C5 C 0.5453(4) 0.1969(4) 0.7585(3) 0.0923(9) Uani 1 1 d . . . 
H5 H 0.4581 0.1094 0.7614 0.111 Uiso 1 1 calc R . . 
C6 C 0.8980(2) 0.7186(2) 0.78761(13) 0.0380(3) Uani 1 1 d . . . 
C7 C 0.9892(2) 0.8653(3) 0.83941(16) 0.0502(4) Uani 1 1 d . . . 
C8 C 1.1486(3) 0.9365(4) 0.7943(2) 0.0776(7) Uani 1 1 d . . . 
H8A H 1.2237 0.9727 0.8547 0.093 Uiso 1 1 calc R . . 
H8B H 1.1244 1.0526 0.7523 0.093 Uiso 1 1 calc R . . 
C9 C 1.2381(3) 0.7953(4) 0.7232(2) 0.0740(7) Uani 1 1 d . . . 
H9A H 1.3485 0.7732 0.7555 0.089 Uiso 1 1 calc R . . 
H9B H 1.2507 0.8550 0.6528 0.089 Uiso 1 1 calc R . . 
C10 C 1.1528(2) 0.6001(3) 0.70593(17) 0.0514(4) Uani 1 1 d . . . 
H10A H 1.1759 0.5188 0.7690 0.062 Uiso 1 1 calc R . . 
H10B H 1.1971 0.5364 0.6434 0.062 Uiso 1 1 calc R . . 
C11 C 0.9325(3) 0.9439(4) 0.93525(17) 0.0625(5) Uani 1 1 d . . . 
H11 H 0.9920 1.0427 0.9705 0.075 Uiso 1 1 calc R . . 
C12 C 0.7891(3) 0.8759(4) 0.97766(17) 0.0663(6) Uani 1 1 d . . . 
H12 H 0.7519 0.9309 1.0409 0.080 Uiso 1 1 calc R . . 
C13 C 0.7001(2) 0.7291(3) 0.92889(15) 0.0543(5) Uani 1 1 d . . . 
H13 H 0.6043 0.6838 0.9595 0.065 Uiso 1 1 calc R . . 
C14 C 0.7535(2) 0.6470(3) 0.83259(13) 0.0395(3) Uani 1 1 d . . . 
C15 C 0.7392(3) 0.7111(3) 0.55250(15) 0.0574(5) Uani 1 1 d . . . 
H15 H 0.6884 0.7952 0.5023 0.069 Uiso 1 1 calc R . . 
C16 C 0.6502(2) 0.5708(3) 0.59281(15) 0.0550(5) Uani 1 1 d . . . 
H16 H 0.5403 0.5562 0.5679 0.066 Uiso 1 1 calc R . . 
C17 C 0.6599(3) 0.2239(3) 0.6682(2) 0.0658(6) Uani 1 1 d . . . 
H17A H 0.6020 0.2019 0.5985 0.079 Uiso 1 1 calc R . . 
H17B H 0.7528 0.1349 0.6756 0.079 Uiso 1 1 calc R . . 
 
loop_ 
 _atom_site_aniso_label 
 _atom_site_aniso_U_11 
 _atom_site_aniso_U_22 
 _atom_site_aniso_U_33 
 _atom_site_aniso_U_23 
 _atom_site_aniso_U_13 
 _atom_site_aniso_U_12 
O1 0.1022(11) 0.0462(7) 0.0499(7) 0.0078(6) 0.0395(7) 0.0059(7) 
O2 0.0448(6) 0.0301(5) 0.0412(5) -0.0018(5) 0.0116(4) -0.0019(5) 
N1 0.0453(7) 0.0455(8) 0.0432(7) 0.0012(6) 0.0133(6) -0.0049(6) 
C1 0.0633(10) 0.0324(7) 0.0396(8) 0.0033(7) 0.0185(7) 0.0030(7) 
C2 0.0396(7) 0.0311(7) 0.0387(8) -0.0016(6) 0.0094(6) -0.0024(6) 
C3 0.0466(8) 0.0420(8) 0.0430(8) -0.0045(7) 0.0081(6) -0.0076(8) 
C4 0.0986(18) 0.0652(15) 0.0675(14) 0.0076(11) 0.0336(13) -0.0239(13) 
C5 0.102(2) 0.0707(18) 0.107(2) -0.0032(16) 0.0324(16) -0.0415(16) 
C6 0.0410(7) 0.0371(8) 0.0362(7) -0.0020(6) 0.0050(6) 0.0021(6) 
C7 0.0529(9) 0.0483(10) 0.0496(9) -0.0120(8) 0.0042(7) -0.0032(8) 
C8 0.0689(13) 0.0700(14) 0.0957(18) -0.0298(15) 0.0213(12) -0.0285(13) 
C9 0.0465(10) 0.0743(15) 0.1026(18) -0.0215(14) 0.0191(10) -0.0173(10) 
C10 0.0400(8) 0.0523(10) 0.0628(11) -0.0078(9) 0.0115(7) -0.0001(8) 
C11 0.0680(12) 0.0631(12) 0.0563(11) -0.0251(10) 0.0013(9) -0.0012(11) 
C12 0.0758(13) 0.0813(16) 0.0427(9) -0.0223(10) 0.0112(9) 0.0111(11) 
C13 0.0538(10) 0.0682(12) 0.0423(9) -0.0048(9) 0.0158(7) 0.0071(9) 
C14 0.0405(7) 0.0430(8) 0.0354(7) -0.0004(6) 0.0074(6) 0.0035(7) 
C15 0.0715(12) 0.0578(12) 0.0425(9) 0.0110(8) -0.0026(8) 0.0086(9) 
C16 0.0506(9) 0.0685(13) 0.0452(9) 0.0023(9) -0.0063(7) -0.0052(9) 
C17 0.0664(13) 0.0481(11) 0.0838(15) -0.0132(11) 0.0155(11) -0.0213(10) 
 
_geom_special_details 
; 
 All esds (except the esd in the dihedral angle between two l.s. planes) 
 are estimated using the full covariance matrix.  The cell esds are taken 
 into account individually in the estimation of esds in distances, angles 
 and torsion angles; correlations between esds in cell parameters are only 
 used when they are defined by crystal symmetry.  An approximate (isotropic) 
 treatment of cell esds is used for estimating esds involving l.s. planes. 
; 
 
loop_ 
 _geom_bond_atom_site_label_1 
 _geom_bond_atom_site_label_2 
 _geom_bond_distance 
 _geom_bond_site_symmetry_2 
 _geom_bond_publ_flag 
O1 C1 1.430(2) . ? 
O1 H1 0.8200 . ? 
O2 C3 1.434(2) . ? 
O2 C2 1.4444(18) . ? 
N1 C14 1.387(2) . ? 
N1 C4 1.436(3) . ? 
N1 C3 1.453(2) . ? 
C1 C15 1.492(3) . ? 
C1 C2 1.542(2) . ? 
C1 H1A 0.9800 . ? 
C2 C6 1.516(2) . ? 
C2 C10 1.525(2) . ? 
C3 C16 1.500(3) . ? 
C3 C17 1.533(3) . ? 
C4 C5 1.463(4) . ? 
C4 H4A 0.9700 . ? 
C4 H4B 0.9700 . ? 
C5 C17 1.492(4) . ? 
C5 H5 0.9300 . ? 
C6 C7 1.390(2) . ? 
C6 C14 1.403(2) . ? 
C7 C11 1.397(3) . ? 
C7 C8 1.507(3) . ? 
C8 C9 1.516(3) . ? 
C8 H8A 0.9700 . ? 
C8 H8B 0.9700 . ? 
C9 C10 1.524(3) . ? 
C9 H9A 0.9700 . ? 
C9 H9B 0.9700 . ? 
C10 H10A 0.9700 . ? 
C10 H10B 0.9700 . ? 
C11 C12 1.374(3) . ? 
C11 H11 0.9300 . ? 
C12 C13 1.365(3) . ? 
C12 H12 0.9300 . ? 
C13 C14 1.402(2) . ? 
C13 H13 0.9300 . ? 
C15 C16 1.318(3) . ? 
C15 H15 0.9300 . ? 
C16 H16 0.9300 . ? 
C17 H17A 0.9700 . ? 
C17 H17B 0.9700 . ? 
 
loop_ 
 _geom_angle_atom_site_label_1 
 _geom_angle_atom_site_label_2 
 _geom_angle_atom_site_label_3 
 _geom_angle 
 _geom_angle_site_symmetry_1 
 _geom_angle_site_symmetry_3 
 _geom_angle_publ_flag 
C1 O1 H1 109.5 . . ? 
C3 O2 C2 111.24(12) . . ? 
C14 N1 C4 122.83(17) . . ? 
C14 N1 C3 116.79(13) . . ? 
C4 N1 C3 110.96(16) . . ? 
O1 C1 C15 109.83(16) . . ? 
O1 C1 C2 109.39(14) . . ? 
C15 C1 C2 110.18(14) . . ? 
O1 C1 H1A 109.1 . . ? 
C15 C1 H1A 109.1 . . ? 
C2 C1 H1A 109.1 . . ? 
O2 C2 C6 109.46(12) . . ? 
O2 C2 C10 106.35(13) . . ? 
C6 C2 C10 108.65(13) . . ? 
O2 C2 C1 108.31(13) . . ? 
C6 C2 C1 111.38(13) . . ? 
C10 C2 C1 112.53(14) . . ? 
O2 C3 N1 111.33(13) . . ? 
O2 C3 C16 109.71(14) . . ? 
N1 C3 C16 108.17(15) . . ? 
O2 C3 C17 107.61(16) . . ? 
N1 C3 C17 103.99(16) . . ? 
C16 C3 C17 115.95(18) . . ? 
N1 C4 C5 105.03(19) . . ? 
N1 C4 H4A 110.7 . . ? 
C5 C4 H4A 110.7 . . ? 
N1 C4 H4B 110.7 . . ? 
C5 C4 H4B 110.7 . . ? 
H4A C4 H4B 108.8 . . ? 
C4 C5 C17 105.4(2) . . ? 
C4 C5 H5 127.3 . . ? 
C17 C5 H5 127.3 . . ? 
C7 C6 C14 120.44(15) . . ? 
C7 C6 C2 118.92(15) . . ? 
C14 C6 C2 120.39(15) . . ? 
C6 C7 C11 119.02(18) . . ? 
C6 C7 C8 120.68(17) . . ? 
C11 C7 C8 120.28(19) . . ? 
C7 C8 C9 116.2(2) . . ? 
C7 C8 H8A 108.2 . . ? 
C9 C8 H8A 108.2 . . ? 
C7 C8 H8B 108.2 . . ? 
C9 C8 H8B 108.2 . . ? 
H8A C8 H8B 107.4 . . ? 
C8 C9 C10 115.22(17) . . ? 
C8 C9 H9A 108.5 . . ? 
C10 C9 H9A 108.5 . . ? 
C8 C9 H9B 108.5 . . ? 
C10 C9 H9B 108.5 . . ? 
H9A C9 H9B 107.5 . . ? 
C9 C10 C2 111.11(16) . . ? 
C9 C10 H10A 109.4 . . ? 
C2 C10 H10A 109.4 . . ? 
C9 C10 H10B 109.4 . . ? 
C2 C10 H10B 109.4 . . ? 
H10A C10 H10B 108.0 . . ? 
C12 C11 C7 120.2(2) . . ? 
C12 C11 H11 119.9 . . ? 
C7 C11 H11 119.9 . . ? 
C13 C12 C11 121.38(18) . . ? 
C13 C12 H12 119.3 . . ? 
C11 C12 H12 119.3 . . ? 
C12 C13 C14 119.84(18) . . ? 
C12 C13 H13 120.1 . . ? 
C14 C13 H13 120.1 . . ? 
N1 C14 C13 120.62(16) . . ? 
N1 C14 C6 120.32(14) . . ? 
C13 C14 C6 119.05(17) . . ? 
C16 C15 C1 122.61(18) . . ? 
C16 C15 H15 118.7 . . ? 
C1 C15 H15 118.7 . . ? 
C15 C16 C3 122.24(17) . . ? 
C15 C16 H16 118.9 . . ? 
C3 C16 H16 118.9 . . ? 
C5 C17 C3 105.51(19) . . ? 
C5 C17 H17A 110.6 . . ? 
C3 C17 H17A 110.6 . . ? 
C5 C17 H17B 110.6 . . ? 
C3 C17 H17B 110.6 . . ? 
H17A C17 H17B 108.8 . . ? 
 
_diffrn_measured_fraction_theta_max    1.000 
_diffrn_reflns_theta_full              26.37 
_diffrn_measured_fraction_theta_full   1.000 
_refine_diff_density_max    0.348 
_refine_diff_density_min   -0.202 
_refine_diff_density_rms    0.048 
#END
